# Supplementary material
Source: publisher figshare collection journal article supplement (https://gsajournals.figshare.com/ndownloader/files/13991150)
Supplement: Supplementary file 1 [file 13991150]

## Sheet: TableS5
Table S5 Statistics for linkage groups construction
	Total length (Mb)	% Scaffolds	Scaffolds Numbers	Gene Numbers	% of Gene Numbers
Scaffold	718.98	-	296545	46114	-
Chromosome	521.75	72.57	1480	39473	85.6
With Order	382.02	53.13	694	-	-
